# Supplementary material for: A Comparative Study for Stock Market Forecast Based on a New Machine Learning Model
Source: MDPI journal article supplement (doi:10.3390/bdcc8040034), 2024-03-26
Supplement: s1 [file s1]

## Article

# A Comparative Study for Stock Market Forecast Based on a New Machine Learning Model (Supplementary Material)

Enrique González-Núñez <sup>1,\*</sup> , Luis A. Trejo <sup>1</sup>  and Michael Kampouridis <sup>2</sup> 

<sup>1</sup> School of Engineering and Science, Tecnológico de Monterrey, Atizapán de Zaragoza 52926, Mexico; ltrepo@tec.mx

<sup>2</sup> School of Computer Science and Electronic Engineering, University of Essex, Wivenhoe Park, Colchester CO4 3SQ, Essex, UK; mkampo@essex.ac.uk

\* Correspondence: enrique.gonzalez@tec.mx

## S1. Results for the AHC models

This appendix contains complementary results for the experiments performed in Section 4.1, for the AHC models of the eight stock market indices.

**Table S1.** Statistical measures of the sum of squares and the R-square of the AHC model.

| Index   | Training Model Performance |          |          |          |
|---------|----------------------------|----------|----------|----------|
|         | RSS                        | SSR      | TSS      | R-square |
| IPC     | 0.3444                     | 144.0767 | 144.421  | 0.9976   |
| S&P 500 | 0.5648                     | 314.3745 | 314.9393 | 0.9982   |
| DAX     | 0.5688                     | 235.2522 | 235.8210 | 0.9976   |
| DJIA    | 0.3454                     | 276.9615 | 277.3069 | 0.9988   |
| FTSE    | 0.3474                     | 51.218   | 51.5654  | 0.9933   |
| N225    | 0.6387                     | 269.0818 | 269.7205 | 0.9976   |
| NDX     | 0.8722                     | 807.5651 | 808.4373 | 0.9989   |
| CAC     | 0.4897                     | 88.9595  | 89.4492  | 0.9945   |

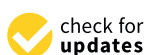

**Citation:** González-Núñez, E.; Trejo, L. A.; Kampouridis, M. A Comparative Study for Stock Market Forecast Based on a New Machine Learning Model. *Big Data Cogn. Comput.* **2024**, *8*, 34. <https://doi.org/10.3390/bdcc8040034>

Academic Editor: Min Chen

Received: 25 January 2024

Revised: 3 March 2024

Accepted: 7 March 2024

Published: 26 March 2024

**Table S2.** Descriptive statistics of the relative error.

| Index   | Training Relative Error |        |        |        |        |        |        |
|---------|-------------------------|--------|--------|--------|--------|--------|--------|
|         | Mean                    | Median | SD     | MAD    | Max    | Min    | Range  |
| IPC     | 0.0008                  | 0.0005 | 0.0009 | 0.0006 | 0.0104 | 0.0000 | 0.0104 |
| S&P 500 | 0.0011                  | 0.0006 | 0.0018 | 0.0009 | 0.0491 | 0.0000 | 0.0491 |
| DAX     | 0.0011                  | 0.0007 | 0.0014 | 0.0008 | 0.0388 | 0.0000 | 0.0388 |
| DJIA    | 0.0008                  | 0.0005 | 0.001  | 0.0006 | 0.0126 | 0.0000 | 0.0126 |
| FTSE    | 0.0009                  | 0.0006 | 0.0011 | 0.0007 | 0.0136 | 0.0000 | 0.0136 |
| N225    | 0.0011                  | 0.0007 | 0.0013 | 0.0008 | 0.0408 | 0.0000 | 0.0408 |
| NDX     | 0.0012                  | 0.0007 | 0.002  | 0.0009 | 0.0596 | 0.0000 | 0.0596 |
| CAC     | 0.0011                  | 0.0008 | 0.0013 | 0.0008 | 0.0247 | 0.0000 | 0.0247 |

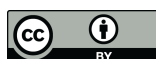

**Copyright:** © 2024 by the authors. Licensee MDPI, Basel, Switzerland. This article is an open access article distributed under the terms and conditions of the Creative Commons Attribution (CC BY) license (<https://creativecommons.org/licenses/by/4.0/>).

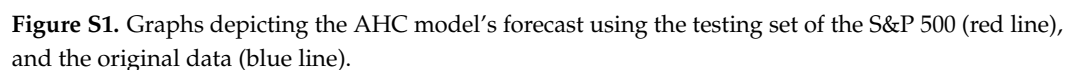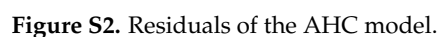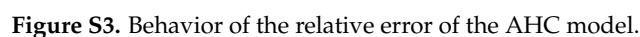[illegible]

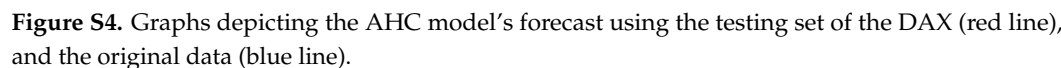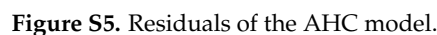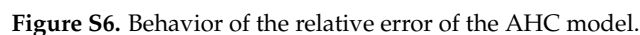[illegible]

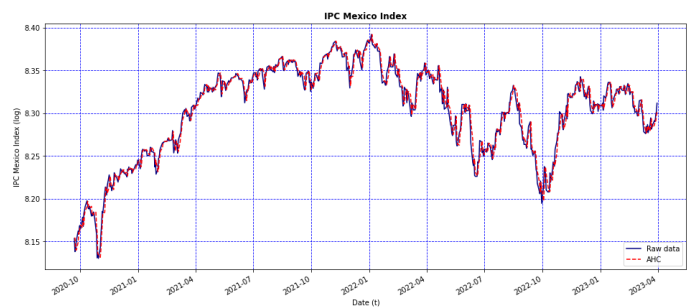

**Figure S7.** Graphs depicting the AHC model’s forecast using the testing set of the DJIA (red line), and the original data (blue line).

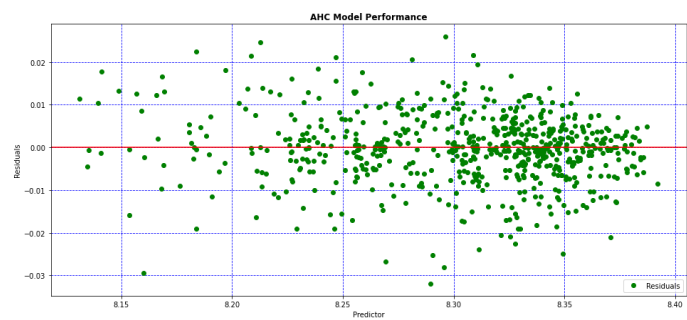

**Figure S8.** Residuals of the AHC model.

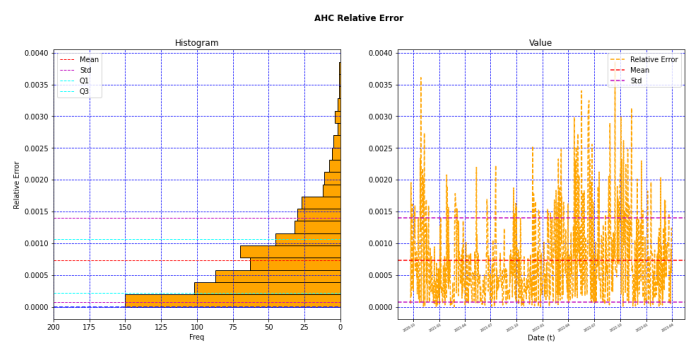

**Figure S9.** Behavior of the relative error of the AHC model.

**Table S5.** Structure of the computed AHC compound for the DJIA model: two molecules, and 16 coefficients per molecule.

| Computed AHC model |                         |                         |
|--------------------|-------------------------|-------------------------|
| Molecule           | 1                       | 2                       |
| $\tau$             | Cl                      | Cl                      |
| $\hat{a}_0$        | $9.40 \times 10^{-3}$   | $6.77 \times 10^{-2}$   |
| $\hat{a}_1$        | 0.8449                  | 0.8601                  |
| $\hat{a}_2$        | 0.1538                  | 0.1311                  |
| $\hat{a}_3$        | $-2.42 \times 10^{-4}$  | $-3.83 \times 10^{-3}$  |
| $\hat{a}_4$        | $7.84 \times 10^{-5}$   | $3.79 \times 10^{-3}$   |
| $\hat{a}_5$        | $1.26 \times 10^{-9}$   | $8.96 \times 10^{-10}$  |
| $\hat{a}_6$        | $1.79 \times 10^{-10}$  | $-1.66 \times 10^{-10}$ |
| $\hat{a}_7$        | $-1.02 \times 10^{-10}$ | $-2.63 \times 10^{-11}$ |
| $\hat{a}_8$        | $1.58 \times 10^{-10}$  | $6.18 \times 10^{-11}$  |
| $\hat{a}_9$        | $7.21 \times 10^{-10}$  | $3.64 \times 10^{-10}$  |
| $\hat{a}_{10}$     | $3.43 \times 10^{-12}$  | $3.82 \times 10^{-11}$  |
| $\hat{a}_{11}$     | $-3.54 \times 10^{-11}$ | $4.82 \times 10^{-14}$  |
| $\hat{a}_{12}$     | $9.52 \times 10^{-12}$  | $-2.45 \times 10^{-11}$ |
| $\hat{a}_{13}$     | $-2.20 \times 10^{-8}$  | $-2.80 \times 10^{-8}$  |
| $\hat{a}_{14}$     | $-1.78 \times 10^{-10}$ | $3.45 \times 10^{-11}$  |
| $\hat{a}_{15}$     | 0                       | 0                       |

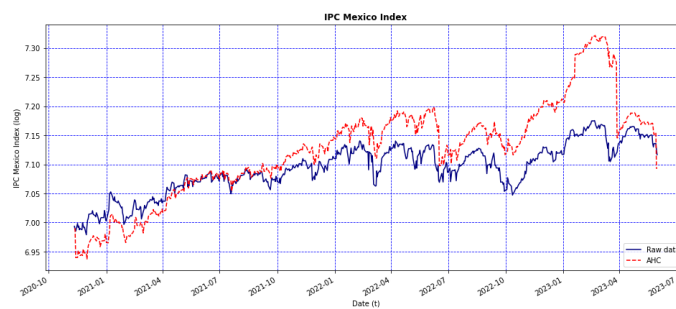**Figure S10.** Graphs depicting the AHC model's forecast using the testing set of the FTSE (red line), and the original data (blue line).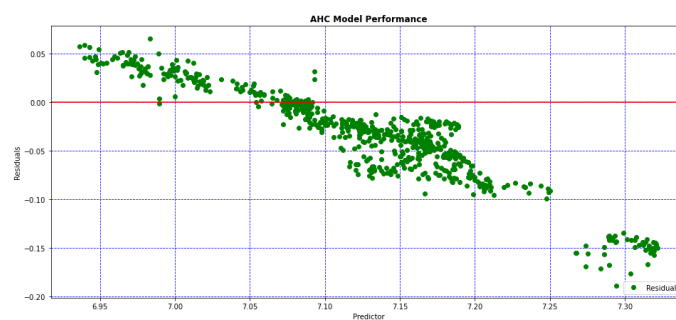**Figure S11.** Residuals of the AHC model.

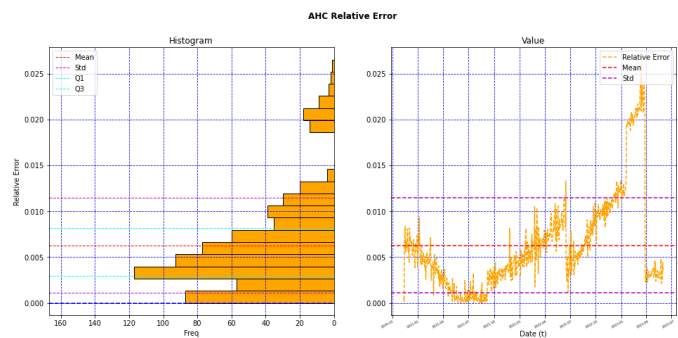

Figure S12. Behavior of the relative error of the AHC model.

Table S6. Structure of the computed AHC compound for the FTSE model: 12 molecules, and 16 coefficients per molecule.

| Computed AHC model |                         |                         |                         |                         |                         |                         |                         |                         |                         |                         |                        |                        |
|--------------------|-------------------------|-------------------------|-------------------------|-------------------------|-------------------------|-------------------------|-------------------------|-------------------------|-------------------------|-------------------------|------------------------|------------------------|
| Molecule           | 1                       | 2                       | 3                       | 4                       | 5                       | 6                       | 7                       | 8                       | 9                       | 10                      | 11                     | 12                     |
| $\epsilon$         | 0.4846                  | 0.6342                  | 0.1676                  | 0.6157                  | 0.4328                  | 0.5910                  | 0.6893                  | 0.2214                  | 0.8477                  | 5.6342                  | 5.4929                 | 5.5194                 |
| $\hat{a}_1$        | 0.9109                  | 0.9175                  | 0.9739                  | 1.0274                  | 1.0005                  | 0.8924                  | 0.9610                  | 0.8933                  | 0.8187                  | $-9.08 \times 10^{-10}$ | $8.84 \times 10^{-10}$ | $6.76 \times 10^{-10}$ |
| $\hat{a}_2$        | $9.60 \times 10^{-3}$   | $1.73 \times 10^{-2}$   | $1.68 \times 10^{-3}$   | -0.1235                 | $-5.45 \times 10^{-2}$  | $2.47 \times 10^{-2}$   | $-9.21 \times 10^{-2}$  | $7.86 \times 10^{-2}$   | $4.64 \times 10^{-2}$   | $1.16 \times 10^{-8}$   | $3.32 \times 10^{-8}$  | $-1.01 \times 10^{-7}$ |
| $\hat{a}_3$        | $6.73 \times 10^{-2}$   | $-2.48 \times 10^{-2}$  | $2.17 \times 10^{-3}$   | $6.00 \times 10^{-2}$   | $1.80 \times 10^{-2}$   | $1.29 \times 10^{-3}$   | 0.1325                  | $1.13 \times 10^{-2}$   | -0.1025                 | $-4.86 \times 10^{-8}$  | $-1.79 \times 10^{-3}$ | $-3.75 \times 10^{-6}$ |
| $\hat{a}_4$        | $2.48 \times 10^{-2}$   | 0.1079                  | $4.11 \times 10^{-3}$   | $3.04 \times 10^{-2}$   | $2.79 \times 10^{-2}$   | $5.55 \times 10^{-3}$   | -0.4471                 | $1.16 \times 10^{-2}$   | $5.14 \times 10^{-2}$   | $8.35 \times 10^{-3}$   | $1.18 \times 10^{-2}$  | $1.30 \times 10^{-2}$  |
| $\hat{a}_5$        | $-9.50 \times 10^{-10}$ | $-1.82 \times 10^{-9}$  | $5.37 \times 10^{-10}$  | $-1.56 \times 10^{-9}$  | $-7.10 \times 10^{-10}$ | $-1.67 \times 10^{-9}$  | $-1.96 \times 10^{-9}$  | $1.51 \times 10^{-10}$  | $-2.99 \times 10^{-9}$  | $1.55 \times 10^{-3}$   | $-1.84 \times 10^{-3}$ | $-1.45 \times 10^{-3}$ |
| $\hat{a}_6$        | $2.15 \times 10^{-9}$   | $-3.08 \times 10^{-9}$  | $-8.14 \times 10^{-10}$ | $-3.16 \times 10^{-9}$  | $-2.18 \times 10^{-9}$  | $2.89 \times 10^{-9}$   | $3.41 \times 10^{-9}$   | $-1.00 \times 10^{-9}$  | $-4.06 \times 10^{-9}$  | $6.03 \times 10^{-2}$   | $-1.04 \times 10^{-3}$ | $-1.99 \times 10^{-3}$ |
| $\hat{a}_7$        | $-6.77 \times 10^{-11}$ | $-2.07 \times 10^{-9}$  | $-6.71 \times 10^{-11}$ | $-1.33 \times 10^{-10}$ | $9.80 \times 10^{-11}$  | $1.46 \times 10^{-10}$  | $-5.15 \times 10^{-10}$ | $-1.38 \times 10^{-10}$ | $-1.47 \times 10^{-10}$ | $8.56 \times 10^{-11}$  | $8.55 \times 10^{-11}$ | $3.75 \times 10^{-10}$ |
| $\hat{a}_8$        | $1.12 \times 10^{-11}$  | $-2.15 \times 10^{-10}$ | $3.93 \times 10^{-11}$  | $-7.53 \times 10^{-11}$ | $9.17 \times 10^{-11}$  | $2.47 \times 10^{-10}$  | $-7.70 \times 10^{-12}$ | $-8.88 \times 10^{-11}$ | $-1.07 \times 10^{-9}$  | $-1.10 \times 10^{-8}$  | $-2.88 \times 10^{-9}$ | $-5.08 \times 10^{-9}$ |
| $\hat{a}_9$        | $-1.55 \times 10^{-9}$  | $-2.45 \times 10^{-9}$  | $-1.38 \times 10^{-10}$ | $-2.36 \times 10^{-9}$  | $-1.44 \times 10^{-9}$  | $-2.28 \times 10^{-9}$  | $2.68 \times 10^{-9}$   | $-4.28 \times 10^{-10}$ | $-3.53 \times 10^{-9}$  | $-2.24 \times 10^{-8}$  | $-2.89 \times 10^{-8}$ | $3.90 \times 10^{-8}$  |
| $\hat{a}_{10}$     | $-7.38 \times 10^{-11}$ | $-3.27 \times 10^{-10}$ | $4.13 \times 10^{-11}$  | $-4.30 \times 10^{-10}$ | $1.32 \times 10^{-10}$  | $4.25 \times 10^{-11}$  | $-9.43 \times 10^{-10}$ | $1.25 \times 10^{-10}$  | $-5.13 \times 10^{-10}$ | 0                       | 0                      | 0                      |
| $\hat{a}_{11}$     | $-6.76 \times 10^{-11}$ | $5.77 \times 10^{-10}$  | $1.31 \times 10^{-11}$  | $-1.33 \times 10^{-9}$  | $3.67 \times 10^{-10}$  | $5.13 \times 10^{-10}$  | $1.30 \times 10^{-10}$  | $2.17 \times 10^{-11}$  | $-1.77 \times 10^{-9}$  | 0                       | 0                      | 0                      |
| $\hat{a}_{12}$     | $1.11 \times 10^{-10}$  | $-4.46 \times 10^{-10}$ | $2.39 \times 10^{-10}$  | $5.80 \times 10^{-10}$  | $2.01 \times 10^{-10}$  | $9.12 \times 10^{-11}$  | $1.16 \times 10^{-9}$   | $2.69 \times 10^{-10}$  | $-5.90 \times 10^{-10}$ | 0                       | 0                      | 0                      |
| $\hat{a}_{13}$     | $1.12 \times 10^{-6}$   | $3.13 \times 10^{-4}$   | $2.51 \times 10^{-8}$   | $5.57 \times 10^{-4}$   | $2.61 \times 10^{-5}$   | $7.04 \times 10^{-6}$   | $-5.50 \times 10^{-4}$  | $5.87 \times 10^{-7}$   | $1.45 \times 10^{-4}$   | 0                       | 0                      | 0                      |
| $\hat{a}_{14}$     | $9.70 \times 10^{-11}$  | $-2.35 \times 10^{-10}$ | $-2.33 \times 10^{-11}$ | $-2.84 \times 10^{-10}$ | $2.61 \times 10^{-5}$   | $-3.73 \times 10^{-10}$ | $1.39 \times 10^{-10}$  | $6.72 \times 10^{-11}$  | $-3.78 \times 10^{-10}$ | 0                       | 0                      | 0                      |
| $\hat{a}_{15}$     | 0                       | 0                       | 0                       | 0                       | 0                       | 0                       | 0                       | 0                       | 0                       | 0                       | 0                      | 0                      |

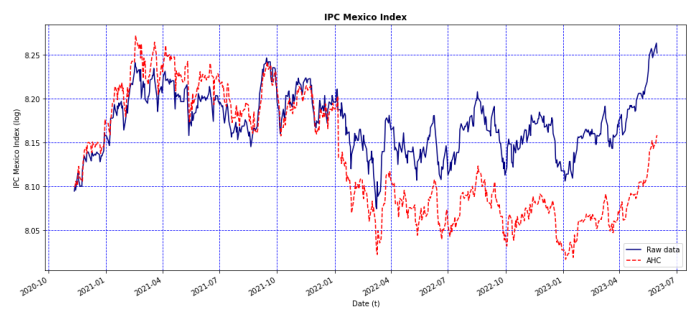

Figure S13. Graphs depicting the AHC model's forecast using the testing set of the N225 (red line), and the original data (blue line).

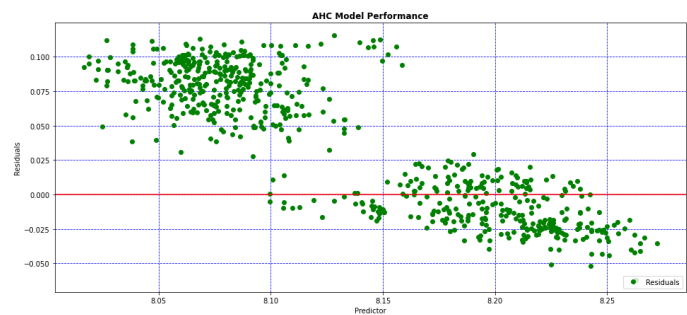

Figure S14. Residuals of the AHC model.

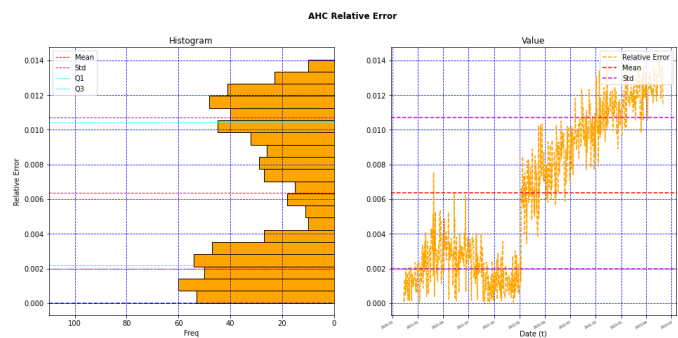

Figure S15. Behavior of the relative error of the AHC model.

Table S7. Structure of the computed AHC compound for the N225 model: 12 molecules, and 16 coefficients per molecule.

| Computed AHC model |                         |                         |                         |                         |                         |                         |                        |                         |                         |                         |                         |                        |
|--------------------|-------------------------|-------------------------|-------------------------|-------------------------|-------------------------|-------------------------|------------------------|-------------------------|-------------------------|-------------------------|-------------------------|------------------------|
| Molecule           | 1                       | 2                       | 3                       | 4                       | 5                       | 6                       | 7                      | 8                       | 9                       | 10                      | 11                      | 12                     |
| $\epsilon$         | 0.1397                  | 1.4097                  | 0.1689                  | 0.4703                  | 0.2436                  | 0.4436                  | 6.2383                 | 0.6471                  | 1.1404                  | 0.1798                  | 0.6008                  | 5.9325                 |
| $\hat{a}_1$        | 0.9190                  | 0.9242                  | 0.9020                  | 0.9719                  | 0.9729                  | 0.8707                  | -2.51 $\times 10^{-9}$ | 0.8778                  | 0.9375                  | 0.7989                  | 0.9517                  | -2.07 $\times 10^{-7}$ |
| $\hat{a}_2$        | 6.33 $\times 10^{-2}$   | -9.64 $\times 10^{-2}$  | 7.63 $\times 10^{-2}$   | -3.07 $\times 10^{-2}$  | -5.78 $\times 10^{-3}$  | 4.47 $\times 10^{-2}$   | -6.46 $\times 10^{-9}$ | 3.63 $\times 10^{-2}$   | 8.00 $\times 10^{-2}$   | 0.1506                  | -2.28 $\times 10^{-2}$  | -2.20 $\times 10^{-7}$ |
| $\hat{a}_3$        | -1.22 $\times 10^{-3}$  | 0.2383                  | 7.02 $\times 10^{-4}$   | -1.11 $\times 10^{-2}$  | 3.67 $\times 10^{-3}$   | -7.77 $\times 10^{-2}$  | -6.18 $\times 10^{-8}$ | -8.41 $\times 10^{-3}$  | 0.1776                  | 5.37 $\times 10^{-2}$   | 4.09 $\times 10^{-2}$   | 3.12 $\times 10^{-6}$  |
| $\hat{a}_4$        | 7.66 $\times 10^{-4}$   | -2.86 $\times 10^{-2}$  | -4.03 $\times 10^{-4}$  | -3.45 $\times 10^{-3}$  | 1.53 $\times 10^{-3}$   | 3.63 $\times 10^{-2}$   | 7.07 $\times 10^{-3}$  | 9.45 $\times 10^{-3}$   | -6.47 $\times 10^{-2}$  | -2.58 $\times 10^{-2}$  | -1.65 $\times 10^{-2}$  | 8.68 $\times 10^{-3}$  |
| $\hat{a}_5$        | 5.81 $\times 10^{-10}$  | -6.22 $\times 10^{-9}$  | 3.74 $\times 10^{-10}$  | -1.39 $\times 10^{-9}$  | 1.22 $\times 10^{-10}$  | -1.03 $\times 10^{-9}$  | -2.79 $\times 10^{-4}$ | -2.54 $\times 10^{-9}$  | -5.28 $\times 10^{-9}$  | 2.03 $\times 10^{-10}$  | -1.85 $\times 10^{-9}$  | -2.03 $\times 10^{-4}$ |
| $\hat{a}_6$        | -7.67 $\times 10^{-10}$ | -7.72 $\times 10^{-9}$  | -9.09 $\times 10^{-10}$ | -2.95 $\times 10^{-9}$  | -1.30 $\times 10^{-9}$  | -2.22 $\times 10^{-9}$  | 1.54 $\times 10^{-2}$  | -3.84 $\times 10^{-9}$  | -6.84 $\times 10^{-9}$  | -7.70 $\times 10^{-10}$ | -3.29 $\times 10^{-9}$  | 8.58 $\times 10^{-3}$  |
| $\hat{a}_7$        | 2.62 $\times 10^{-10}$  | -2.49 $\times 10^{-11}$ | 4.93 $\times 10^{-10}$  | -3.00 $\times 10^{-10}$ | 5.35 $\times 10^{-11}$  | 7.94 $\times 10^{-11}$  | 5.05 $\times 10^{-11}$ | -5.03 $\times 10^{-10}$ | -2.97 $\times 10^{-10}$ | 2.14 $\times 10^{-11}$  | 1.88 $\times 10^{-10}$  | 3.19 $\times 10^{-9}$  |
| $\hat{a}_8$        | 3.84 $\times 10^{-10}$  | 3.87 $\times 10^{-9}$   | 2.44 $\times 10^{-10}$  | -1.93 $\times 10^{-10}$ | -1.34 $\times 10^{-10}$ | -1.90 $\times 10^{-9}$  | 2.21 $\times 10^{-10}$ | 6.01 $\times 10^{-10}$  | -8.30 $\times 10^{-10}$ | -3.63 $\times 10^{-10}$ | 2.65 $\times 10^{-10}$  | 7.29 $\times 10^{-8}$  |
| $\hat{a}_9$        | -9.41 $\times 10^{-11}$ | -6.97 $\times 10^{-9}$  | -2.67 $\times 10^{-10}$ | -2.18 $\times 10^{-9}$  | -5.89 $\times 10^{-10}$ | -1.62 $\times 10^{-9}$  | 1.73 $\times 10^{-9}$  | -3.19 $\times 10^{-9}$  | 6.08 $\times 10^{-9}$   | -2.83 $\times 10^{-10}$ | -2.57 $\times 10^{-9}$  | 3.35 $\times 10^{-8}$  |
| $\hat{a}_{10}$     | 2.81 $\times 10^{-12}$  | 4.09 $\times 10^{-10}$  | 1.60 $\times 10^{-11}$  | 1.05 $\times 10^{-10}$  | -1.42 $\times 10^{-11}$ | -3.84 $\times 10^{-10}$ | 0                      | 7.66 $\times 10^{-10}$  | -1.31 $\times 10^{-9}$  | -9.05 $\times 10^{-12}$ | -9.62 $\times 10^{-11}$ | 0                      |
| $\hat{a}_{11}$     | -1.57 $\times 10^{-11}$ | -2.85 $\times 10^{-9}$  | 4.34 $\times 10^{-11}$  | -3.81 $\times 10^{-10}$ | 3.50 $\times 10^{-10}$  | -1.72 $\times 10^{-9}$  | 0                      | -1.73 $\times 10^{-10}$ | 2.61 $\times 10^{-9}$   | 2.67 $\times 10^{-10}$  | -1.96 $\times 10^{-9}$  | 0                      |
| $\hat{a}_{12}$     | 7.79 $\times 10^{-11}$  | 4.41 $\times 10^{-10}$  | 8.85 $\times 10^{-11}$  | 1.22 $\times 10^{-10}$  | 5.34 $\times 10^{-13}$  | -4.77 $\times 10^{-10}$ | 0                      | 9.01 $\times 10^{-10}$  | -1.47 $\times 10^{-9}$  | 9.92 $\times 10^{-11}$  | -1.27 $\times 10^{-10}$ | 0                      |
| $\hat{a}_{13}$     | 5.29 $\times 10^{-8}$   | -1.77 $\times 10^{-4}$  | -3.75 $\times 10^{-8}$  | -1.04 $\times 10^{-6}$  | 2.08 $\times 10^{-6}$   | -4.86 $\times 10^{-5}$  | 0                      | 4.71 $\times 10^{-6}$   | -3.44 $\times 10^{-4}$  | 7.12 $\times 10^{-5}$   | -3.28 $\times 10^{-4}$  | 0                      |
| $\hat{a}_{14}$     | 1.97 $\times 10^{-10}$  | 5.05 $\times 10^{-10}$  | -1.68 $\times 10^{-10}$ | -9.98 $\times 10^{-10}$ | -2.73 $\times 10^{-11}$ | -1.97 $\times 10^{-10}$ | 0                      | 3.57 $\times 10^{-10}$  | 5.47 $\times 10^{-10}$  | 1.27 $\times 10^{-10}$  | 5.48 $\times 10^{-10}$  | 0                      |
| $\hat{a}_{15}$     | 0                       | 0                       | 0                       | 0                       | 0                       | 0                       | 0                      | 0                       | 0                       | 0                       | 0                       | 0                      |

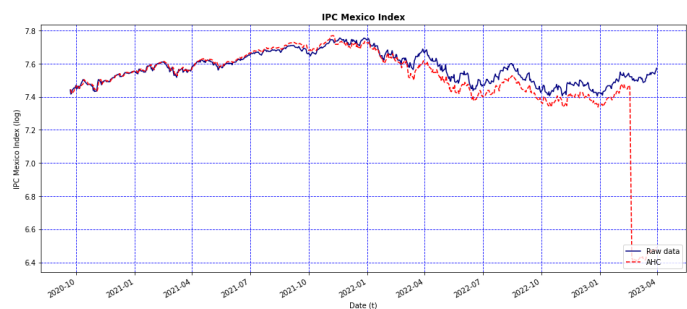

Figure S16. Graphs depicting the AHC model's forecast using the testing set of the NDX (red line), and the original data (blue line).

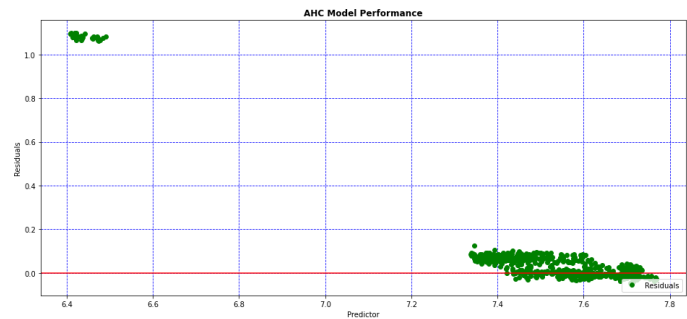

Figure S17. Residuals of the AHC model.

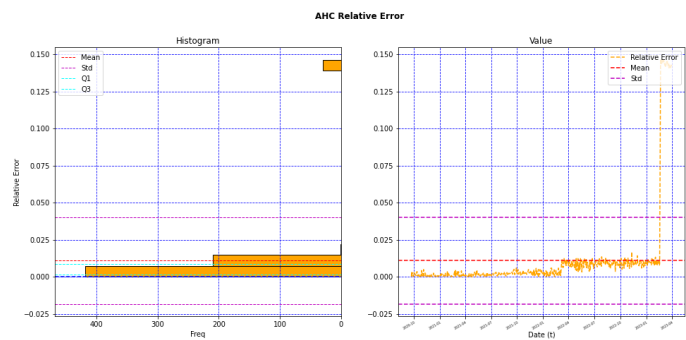

Figure S18. Behavior of the relative error of the AHC model.

Table S8. Structure of the computed AHC compound for the NDX model: 12 molecules, and 16 coefficients per molecule.

| Computed AHC model |                         |                        |                         |                         |                         |                         |                         |                         |                         |                         |                        |                        |
|--------------------|-------------------------|------------------------|-------------------------|-------------------------|-------------------------|-------------------------|-------------------------|-------------------------|-------------------------|-------------------------|------------------------|------------------------|
| Molecule           | 1                       | 2                      | 3                       | 4                       | 5                       | 6                       | 7                       | 8                       | 9                       | 10                      | 11                     | 12                     |
| $\tau$             | CI                      | Is                     | CI                      | Is                      | CI                      | CI                      | CI                      | Is                      | CI                      | Is                      | CI                     | Is                     |
| $a_0$              | $2.25 \times 10^{-2}$   | 4.7814                 | 0.4064                  | 5.0013                  | 0.2237                  | $9.69 \times 10^{-2}$   | 0.4639                  | $-9.12 \times 10^{-2}$  | 4.5989                  | 0.5763                  | 2.4683                 | 4.9469                 |
| $a_1$              | 0.8319                  | $7.68 \times 10^{-7}$  | 0.9439                  | $3.17 \times 10^{-7}$   | 0.9339                  | 0.9750                  | 0.9597                  | 0.7347                  | $-3.46 \times 10^{-7}$  | 0.9793                  | 0.9480                 | $-1.16 \times 10^{-7}$ |
| $a_2$              | 0.1660                  | $1.11 \times 10^{-6}$  | $-7.40 \times 10^{-3}$  | $3.01 \times 10^{-7}$   | $2.21 \times 10^{-2}$   | $1.11 \times 10^{-2}$   | $-3.25 \times 10^{-2}$  | 0.2490                  | $2.37 \times 10^{-7}$   | $-3.07 \times 10^{-2}$  | -0.1593                | $-9.90 \times 10^{-8}$ |
| $a_3$              | $2.99 \times 10^{-3}$   | $-9.72 \times 10^{-4}$ | $-6.02 \times 10^{-3}$  | $-8.71 \times 10^{-6}$  | $5.12 \times 10^{-3}$   | $3.72 \times 10^{-3}$   | $1.45 \times 10^{-2}$   | 0.1284                  | $-3.92 \times 10^{-3}$  | $9.59 \times 10^{-2}$   | -0.2286                | $6.30 \times 10^{-3}$  |
| $a_4$              | $8.50 \times 10^{-3}$   | $2.03 \times 10^{-2}$  | $-2.67 \times 10^{-3}$  | $1.59 \times 10^{-2}$   | $-4.35 \times 10^{-2}$  | $-2.34 \times 10^{-4}$  | $3.08 \times 10^{-3}$   | $-4.54 \times 10^{-2}$  | $1.95 \times 10^{-2}$   | 0.1043                  | -0.1253                | $1.59 \times 10^{-2}$  |
| $a_5$              | $1.05 \times 10^{-9}$   | $-7.34 \times 10^{-4}$ | $-3.25 \times 10^{-10}$ | $-1.14 \times 10^{-4}$  | $3.46 \times 10^{-10}$  | $8.91 \times 10^{-10}$  | $-5.85 \times 10^{-10}$ | $1.19 \times 10^{-9}$   | $1.37 \times 10^{-3}$   | $-1.00 \times 10^{-9}$  | $-7.32 \times 10^{-9}$ | $3.01 \times 10^{-4}$  |
| $a_6$              | $1.22 \times 10^{-10}$  | $-5.17 \times 10^{-2}$ | $-1.46 \times 10^{-9}$  | $4.55 \times 10^{-2}$   | $-7.13 \times 10^{-10}$ | $-4.62 \times 10^{-10}$ | $-1.81 \times 10^{-9}$  | $6.16 \times 10^{-10}$  | $1.59 \times 10^{-2}$   | $-2.28 \times 10^{-9}$  | $-8.61 \times 10^{-9}$ | $6.64 \times 10^{-2}$  |
| $a_7$              | $5.76 \times 10^{-11}$  | $1.48 \times 10^{-7}$  | $4.72 \times 10^{-11}$  | $-4.80 \times 10^{-10}$ | $2.21 \times 10^{-10}$  | $1.28 \times 10^{-11}$  | $-2.31 \times 10^{-12}$ | $3.49 \times 10^{-11}$  | $-6.89 \times 10^{-10}$ | $-1.45 \times 10^{-10}$ | $8.81 \times 10^{-9}$  | $-3.08 \times 10^{-8}$ |
| $a_8$              | $-2.32 \times 10^{-12}$ | $1.12 \times 10^{-5}$  | $-2.01 \times 10^{-9}$  | $-9.01 \times 10^{-7}$  | $2.67 \times 10^{-11}$  | $-1.61 \times 10^{-11}$ | $-1.85 \times 10^{-11}$ | $-1.14 \times 10^{-10}$ | $1.74 \times 10^{-7}$   | $-6.01 \times 10^{-10}$ | $4.13 \times 10^{-9}$  | $-6.07 \times 10^{-8}$ |
| $a_9$              | $5.82 \times 10^{-10}$  | $1.29 \times 10^{-5}$  | $-8.94 \times 10^{-9}$  | $-9.06 \times 10^{-7}$  | $-1.83 \times 10^{-10}$ | $2.14 \times 10^{-10}$  | $-1.19 \times 10^{-9}$  | $9.04 \times 10^{-10}$  | $-1.08 \times 10^{-7}$  | $-1.64 \times 10^{-9}$  | $-7.97 \times 10^{-9}$ | $-6.01 \times 10^{-8}$ |
| $a_{10}$           | $-4.66 \times 10^{-11}$ | 0                      | $-3.84 \times 10^{-10}$ | 0                       | $-6.89 \times 10^{-11}$ | $1.52 \times 10^{-11}$  | $1.25 \times 10^{-10}$  | $2.61 \times 10^{-10}$  | 0                       | $-9.81 \times 10^{-11}$ | $-4.69 \times 10^{-9}$ | 0                      |
| $a_{11}$           | $-3.12 \times 10^{-11}$ | 0                      | $-5.34 \times 10^{-10}$ | 0                       | $-2.17 \times 10^{-11}$ | $7.29 \times 10^{-12}$  | $3.04 \times 10^{-10}$  | $-8.12 \times 10^{-12}$ | 0                       | $8.98 \times 10^{-10}$  | $-5.07 \times 10^{-9}$ | 0                      |
| $a_{12}$           | $-2.92 \times 10^{-11}$ | 0                      | $-6.16 \times 10^{-10}$ | 0                       | $-9.21 \times 10^{-11}$ | $-9.08 \times 10^{-12}$ | $1.84 \times 10^{-10}$  | $1.89 \times 10^{-10}$  | 0                       | $-1.56 \times 10^{-10}$ | $-5.01 \times 10^{-9}$ | 0                      |
| $a_{13}$           | $-2.20 \times 10^{-8}$  | 0                      | $-9.07 \times 10^{-6}$  | 0                       | $1.61 \times 10^{-6}$   | $-3.54 \times 10^{-9}$  | $-1.46 \times 10^{-6}$  | $1.78 \times 10^{-7}$   | 0                       | $1.13 \times 10^{-3}$   | $-3.85 \times 10^{-3}$ | 0                      |
| $a_{14}$           | $7.30 \times 10^{-12}$  | 0                      | $-9.13 \times 10^{-10}$ | 0                       | $8.77 \times 10^{-11}$  | $-1.06 \times 10^{-11}$ | $-8.84 \times 10^{-11}$ | $-5.22 \times 10^{-11}$ | 0                       | $1.78 \times 10^{-10}$  | $-2.61 \times 10^{-8}$ | 0                      |
| $a_{15}$           | 0                       | 0                      | 0                       | 0                       | 0                       | 0                       | 0                       | 0                       | 0                       | 0                       | 0                      | 0                      |

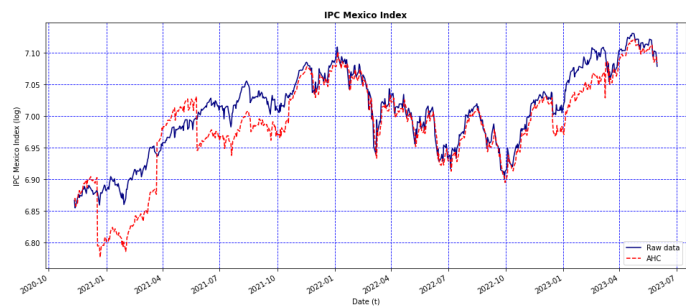

Figure S19. Graphs depicting the AHC model's forecast using the testing set of the CAC (red line), and the original data (blue line).

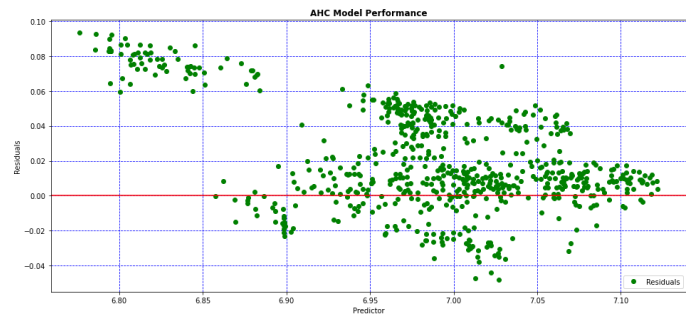

Figure S20. Residuals of the AHC model.



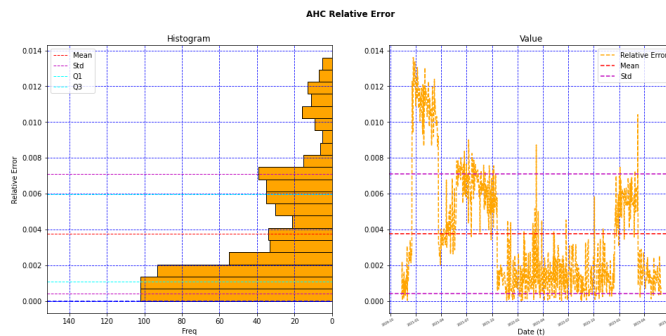

Figure S21. Behavior of the relative error of the AHC model.

Table S9. Structure of the computed AHC compound for the CAC model: 12 molecules, and 16 coefficients per molecule.

| Computed AHC model |                         |                         |                         |                         |                         |                         |                        |                         |                        |                         |                        |                        |
|--------------------|-------------------------|-------------------------|-------------------------|-------------------------|-------------------------|-------------------------|------------------------|-------------------------|------------------------|-------------------------|------------------------|------------------------|
| Molecule           | 1                       | 2                       | 3                       | 4                       | 5                       | 6                       | 7                      | 8                       | 9                      | 10                      | 11                     | 12                     |
| $\bar{r}$          | CI                      | CI                      | CI                      | CI                      | TS                      | CI                      | TS                     | CI                      | TS                     | CI                      | TS                     | TS                     |
| $\hat{a}_0$        | 0.6775                  | 0.5439                  | 0.1171                  | 0.5087                  | 5.4072                  | 0.2000                  | 5.0702                 | 4.24 $\times 10^{-2}$   | 5.2244                 | 1.0449                  | 5.4264                 | 5.5299                 |
| $\hat{a}_1$        | 1.0262                  | 0.9265                  | 0.9239                  | 1.0264                  | 1.25 $\times 10^{-8}$   | 0.9376                  | −2.14 $\times 10^{-8}$ | 0.9422                  | 3.20 $\times 10^{-7}$  | 0.8424                  | −5.02 $\times 10^{-7}$ | 1.16 $\times 10^{-8}$  |
| $\hat{a}_2$        | −0.1271                 | −5.69 $\times 10^{-3}$  | 5.26 $\times 10^{-2}$   | −8.59 $\times 10^{-2}$  | 3.67 $\times 10^{-8}$   | 2.86 $\times 10^{-2}$   | −3.42 $\times 10^{-8}$ | 3.09 $\times 10^{-2}$   | 3.27 $\times 10^{-7}$  | 2.65 $\times 10^{-2}$   | −1.62 $\times 10^{-7}$ | 1.48 $\times 10^{-8}$  |
| $\hat{a}_3$        | −1.67 $\times 10^{-2}$  | −1.37 $\times 10^{-3}$  | 1.34 $\times 10^{-2}$   | 4.40 $\times 10^{-2}$   | 2.27 $\times 10^{-5}$   | 6.61 $\times 10^{-3}$   | −1.17 $\times 10^{-4}$ | −6.98 $\times 10^{-2}$  | −2.02 $\times 10^{-4}$ | 2.72 $\times 10^{-2}$   | 4.87 $\times 10^{-3}$  | 2.39 $\times 10^{-7}$  |
| $\hat{a}_4$        | −3.63 $\times 10^{-3}$  | 9.80 $\times 10^{-3}$   | 1.10 $\times 10^{-2}$   | −1.31 $\times 10^{-2}$  | 1.29 $\times 10^{-2}$   | −2.93 $\times 10^{-3}$  | 1.64 $\times 10^{-2}$  | −2.64 $\times 10^{-2}$  | 1.21 $\times 10^{-2}$  | −3.88 $\times 10^{-2}$  | 9.82 $\times 10^{-3}$  | 1.38 $\times 10^{-2}$  |
| $\hat{a}_5$        | −1.72 $\times 10^{-9}$  | −1.16 $\times 10^{-9}$  | 7.18 $\times 10^{-10}$  | −9.82 $\times 10^{-10}$ | −2.93 $\times 10^{-4}$  | 3.75 $\times 10^{-10}$  | −6.33 $\times 10^{-4}$ | 1.07 $\times 10^{-9}$   | 2.24 $\times 10^{-3}$  | −3.76 $\times 10^{-9}$  | 2.49 $\times 10^{-3}$  | 1.75 $\times 10^{-3}$  |
| $\hat{a}_6$        | −3.29 $\times 10^{-9}$  | −2.40 $\times 10^{-9}$  | −4.78 $\times 10^{-10}$ | −2.50 $\times 10^{-9}$  | −2.63 $\times 10^{-2}$  | −7.99 $\times 10^{-10}$ | −3.62 $\times 10^{-3}$ | −1.48 $\times 10^{-10}$ | −4.01 $\times 10^{-3}$ | −4.88 $\times 10^{-9}$  | −2.24 $\times 10^{-4}$ | −0.2577                |
| $\hat{a}_7$        | −5.04 $\times 10^{-10}$ | 2.81 $\times 10^{-10}$  | −8.51 $\times 10^{-11}$ | −1.18 $\times 10^{-10}$ | −6.09 $\times 10^{-10}$ | −1.21 $\times 10^{-10}$ | 1.58 $\times 10^{-9}$  | 7.66 $\times 10^{-12}$  | 3.63 $\times 10^{-9}$  | 1.36 $\times 10^{-11}$  | 5.37 $\times 10^{-10}$ | 6.41 $\times 10^{-10}$ |
| $\hat{a}_8$        | 2.48 $\times 10^{-9}$   | 1.90 $\times 10^{-9}$   | −1.23 $\times 10^{-11}$ | 3.81 $\times 10^{-10}$  | 1.35 $\times 10^{-8}$   | 1.10 $\times 10^{-7}$   | 2.30 $\times 10^{-7}$  | −2.52 $\times 10^{-11}$ | −1.96 $\times 10^{-7}$ | −7.73 $\times 10^{-10}$ | 2.47 $\times 10^{-7}$  | 1.59 $\times 10^{-8}$  |
| $\hat{a}_9$        | −2.50 $\times 10^{-9}$  | −1.78 $\times 10^{-9}$  | 1.20 $\times 10^{-11}$  | −1.74 $\times 10^{-9}$  | 1.56 $\times 10^{-8}$   | −2.12 $\times 10^{-10}$ | 1.16 $\times 10^{-7}$  | 4.63 $\times 10^{-10}$  | −1.97 $\times 10^{-7}$ | −4.32 $\times 10^{-9}$  | 7.57 $\times 10^{-8}$  | 2.05 $\times 10^{-8}$  |
| $\hat{a}_{10}$     | 2.93 $\times 10^{-10}$  | 1.73 $\times 10^{-10}$  | 2.98 $\times 10^{-11}$  | 4.16 $\times 10^{-10}$  | 0                       | −1.04 $\times 10^{-10}$ | 0                      | −1.09 $\times 10^{-10}$ | 0                      | 8.19 $\times 10^{-10}$  | 0                      | 0                      |
| $\hat{a}_{11}$     | −7.02 $\times 10^{-10}$ | 5.98 $\times 10^{-10}$  | 3.34 $\times 10^{-11}$  | −5.99 $\times 10^{-10}$ | 0                       | 1.14 $\times 10^{-11}$  | 0                      | −1.94 $\times 10^{-10}$ | 0                      | −1.83 $\times 10^{-9}$  | 0                      | 0                      |
| $\hat{a}_{12}$     | 3.73 $\times 10^{-10}$  | 2.58 $\times 10^{-10}$  | −1.63 $\times 10^{-10}$ | 5.93 $\times 10^{-10}$  | 0                       | −3.43 $\times 10^{-10}$ | 0                      | −2.01 $\times 10^{-11}$ | 0                      | 9.23 $\times 10^{-10}$  | 0                      | 0                      |
| $\hat{a}_{13}$     | −2.35 $\times 10^{-6}$  | 5.02 $\times 10^{-6}$   | −5.65 $\times 10^{-7}$  | −2.73 $\times 10^{-5}$  | 0                       | −4.26 $\times 10^{-8}$  | 0                      | 1.75 $\times 10^{-6}$   | 0                      | −1.37 $\times 10^{-3}$  | 0                      | 0                      |
| $\hat{a}_{14}$     | 1.14 $\times 10^{-9}$   | −1.37 $\times 10^{-10}$ | −7.19 $\times 10^{-12}$ | 3.38 $\times 10^{-10}$  | 0                       | 1.50 $\times 10^{-10}$  | 0                      | 1.45 $\times 10^{-11}$  | 0                      | 5.29 $\times 10^{-10}$  | 0                      | 0                      |
| $\hat{a}_{15}$     | 0                       | 0                       | 0                       | 0                       | 0                       | 0                       | 0                      | 0                       | 0                      | 0                       | 0                      | 0                      |

## S2. Results for the GA models

This appendix contains complementary results for the experiments performed in Section 4.2, for the GA models of the eight stock market indices.

Table S10. Statistical measures of the sum of squares and the R-square of the GA model.

| Training Model Performance |          |           |           |          |
|----------------------------|----------|-----------|-----------|----------|
| Index                      | RSS      | SSR       | TSS       | R-square |
| IPC                        | 42.2446  | 194.8260  | 237.0707  | 0.8218   |
| S&P 500                    | 641.9862 | 1279.5598 | 1921.5461 | 0.6659   |
| DAX                        | 156.7972 | 479.4217  | 636.2190  | 0.7535   |
| DJIA                       | 51.4930  | 436.5324  | 488.0255  | 0.8944   |
| FTSE                       | 647.7246 | 649.5375  | 1297.2621 | 0.5006   |
| N225                       | 428.2488 | 890.9307  | 1319.1796 | 0.6753   |
| NDX                        | 243.5902 | 741.9016  | 985.4919  | 0.7528   |
| CAC                        | 533.4923 | 451.6153  | 985.1077  | 0.4584   |

Table S11. Descriptive statistics of the relative error.

| Training Relative Error |        |        |        |        |        |        |        |
|-------------------------|--------|--------|--------|--------|--------|--------|--------|
| Index                   | Mean   | Median | SD     | MAD    | Max    | Min    | Range  |
| IPC                     | 0.0104 | 0.0092 | 0.0069 | 0.0060 | 0.0310 | 0.0000 | 0.0310 |
| S&P 500                 | 0.0536 | 0.0425 | 0.0452 | 0.0385 | 0.1712 | 0.0000 | 0.1712 |
| DAX                     | 0.0226 | 0.0186 | 0.0172 | 0.0133 | 0.1707 | 0.0000 | 0.1707 |
| DJIA                    | 0.0115 | 0.0091 | 0.0101 | 0.0078 | 0.1047 | 0.0000 | 0.1047 |
| FTSE                    | 0.0560 | 0.0571 | 0.0191 | 0.0151 | 0.0997 | 0.0000 | 0.0997 |
| N225                    | 0.0386 | 0.0388 | 0.0226 | 0.0189 | 0.1197 | 0.0000 | 0.1197 |
| NDX                     | 0.0335 | 0.0328 | 0.0227 | 0.0191 | 0.1177 | 0.0000 | 0.1177 |
| CAC                     | 0.0459 | 0.0430 | 0.0310 | 0.0256 | 0.1888 | 0.0000 | 0.1888 |

**Table S12.** Computed GA's genotype with the coefficients (Genes) for the S&P 500 model.

| Computed GA model |            |
|-------------------|------------|
| Gene              | Value      |
| $\hat{a}_0$       | -11.705950 |
| $\hat{a}_1$       | 0.138040   |
| $\hat{a}_2$       | 2.813108   |
| $\hat{a}_3$       | 0.133460   |
| $\hat{a}_4$       | 0.121590   |
| $\hat{a}_5$       | -8.937811  |
| $\hat{a}_6$       | -10.742956 |
| $\hat{a}_7$       | -11.568881 |
| $\hat{a}_8$       | 9.965202   |
| $\hat{a}_9$       | -11.894175 |
| $\hat{a}_{10}$    | -11.298640 |
| $\hat{a}_{11}$    | 8.690697   |
| $\hat{a}_{12}$    | -11.116551 |
| $\hat{a}_{13}$    | 10.605489  |
| $\hat{a}_{14}$    | -9.878893  |

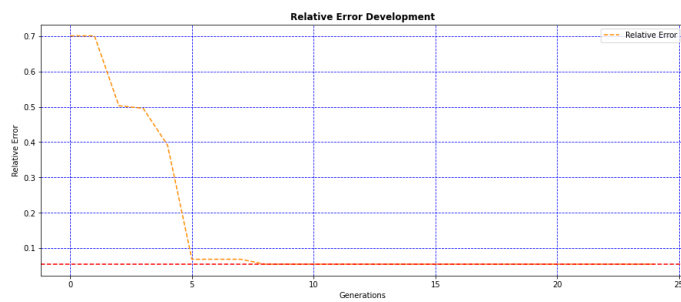**Figure S22.** S&P 500 error behavior through 25 generations.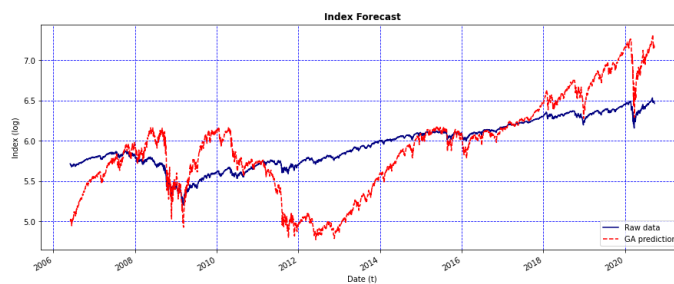**Figure S23.** Curves for the S&P 500 training forecast (red line), and the original data (blue line).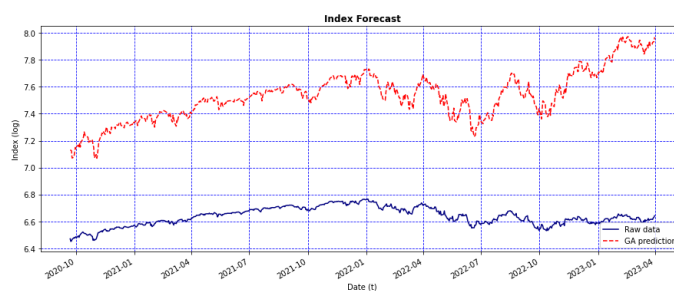**Figure S24.** Graphs depicting the GA model's forecast using the testing set of the S&P 500 (red line), and the original data (blue line).

**Table S13.** Computed GA's genotype with the coefficients (Genes) for the DAX model.

| Computed GA model |                           |
|-------------------|---------------------------|
| Gene              | Value                     |
| $\hat{a}_0$       | 4.351814                  |
| $\hat{a}_1$       | -9.228633                 |
| $\hat{a}_2$       | 9.625772                  |
| $\hat{a}_3$       | $4.459086 \times 10^{-3}$ |
| $\hat{a}_4$       | -0.131584                 |
| $\hat{a}_5$       | -10.252599                |
| $\hat{a}_6$       | -11.415722                |
| $\hat{a}_7$       | 8.936730                  |
| $\hat{a}_8$       | -1.445764                 |
| $\hat{a}_9$       | -11.593349                |
| $\hat{a}_{10}$    | 5.158250                  |
| $\hat{a}_{11}$    | 10.604330                 |
| $\hat{a}_{12}$    | 9.924640                  |
| $\hat{a}_{13}$    | 10.591934                 |
| $\hat{a}_{14}$    | 6.926830                  |

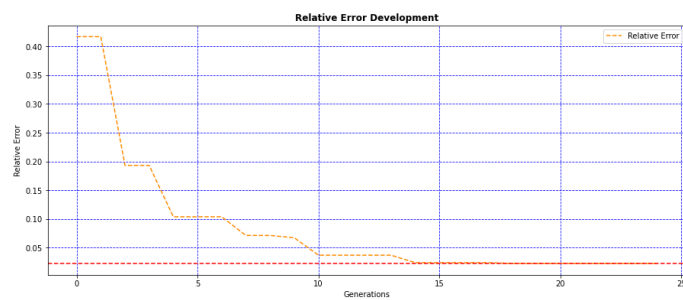**Figure S25.** DAX error behavior through 25 generations.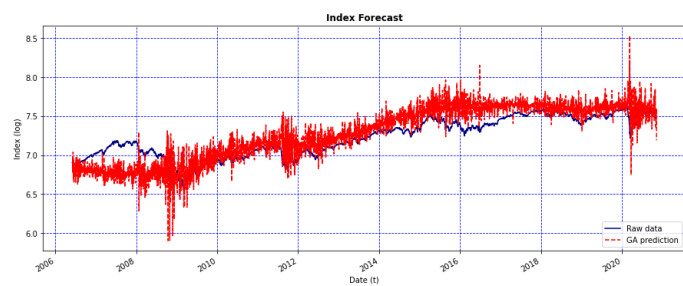**Figure S26.** Curves for the DAX training forecast (red line), and the original data (blue line).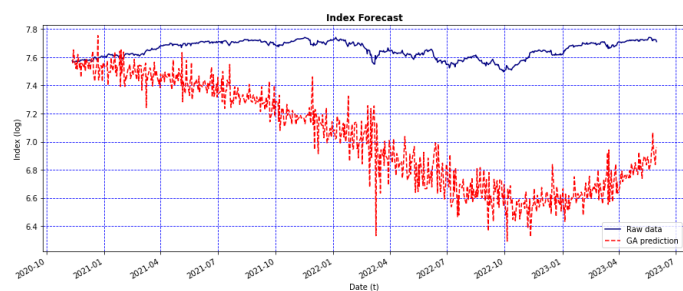**Figure S27.** Graphs depicting the GA model's forecast using the testing set of the DAX (red line), and the original data (blue line).

| Computed GA model |                            |
|-------------------|----------------------------|
| Gene              | Value                      |
| $\hat{a}_0$       | -2.690749                  |
| $\hat{a}_1$       | -6.064102                  |
| $\hat{a}_2$       | 7.410093                   |
| $\hat{a}_3$       | $1.717362 \times 10^{-2}$  |
| $\hat{a}_4$       | $-2.617421 \times 10^{-2}$ |
| $\hat{a}_5$       | 8.634908                   |
| $\hat{a}_6$       | 11.453117                  |
| $\hat{a}_7$       | 5.881121                   |
| $\hat{a}_8$       | 5.954249                   |
| $\hat{a}_9$       | 10.514256                  |
| $\hat{a}_{10}$    | -7.029368                  |
| $\hat{a}_{11}$    | 4.977630                   |
| $\hat{a}_{12}$    | -6.085035                  |
| $\hat{a}_{13}$    | 10.456973                  |
| $\hat{a}_{14}$    | -11.483238                 |

**Table S14.** Computed GA's genotype with the coefficients (Genes) for the DJIA model.

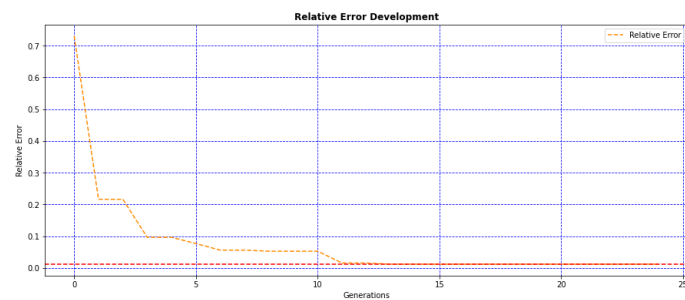

**Figure S28.** DJIA error behavior through 25 generations.

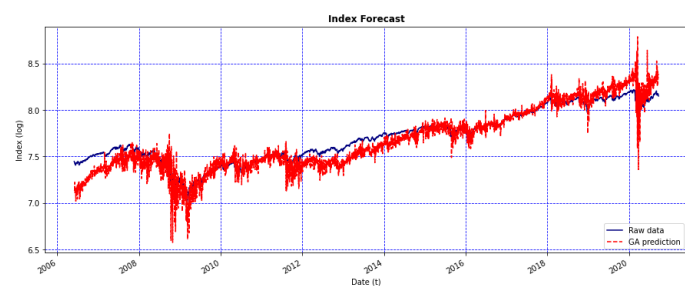

**Figure S29.** Curves for the DJIA training forecast (red line), and the original data (blue line).

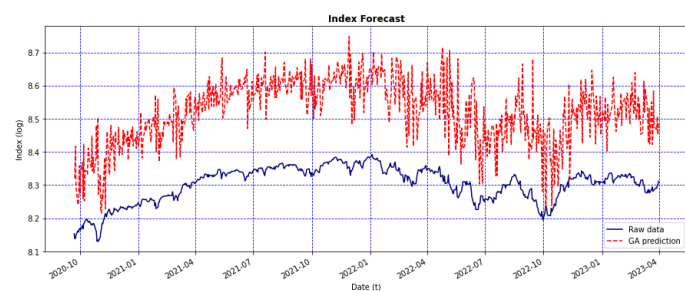

**Figure S30.** Graphs depicting the GA model's forecast using the testing set of the DJIA (red line), and the original data (blue line).

| Computed GA model |                            |
|-------------------|----------------------------|
| Gene              | Value                      |
| $\hat{a}_0$       | 11.537824                  |
| $\hat{a}_1$       | 2.087738                   |
| $\hat{a}_2$       | -2.794673                  |
| $\hat{a}_3$       | $-3.570098 \times 10^{-2}$ |
| $\hat{a}_4$       | $-7.697125 \times 10^{-2}$ |
| $\hat{a}_5$       | 7.835915                   |
| $\hat{a}_6$       | 11.481279                  |
| $\hat{a}_7$       | 4.830762                   |
| $\hat{a}_8$       | 11.247838                  |
| $\hat{a}_9$       | 9.018821                   |
| $\hat{a}_{10}$    | 11.701948                  |
| $\hat{a}_{11}$    | 9.038480                   |
| $\hat{a}_{12}$    | 10.244514                  |
| $\hat{a}_{13}$    | 9.299599                   |
| $\hat{a}_{14}$    | -4.390437                  |

**Table S15.** Computed GA's genotype with the coefficients (Genes) for the FTSE model.

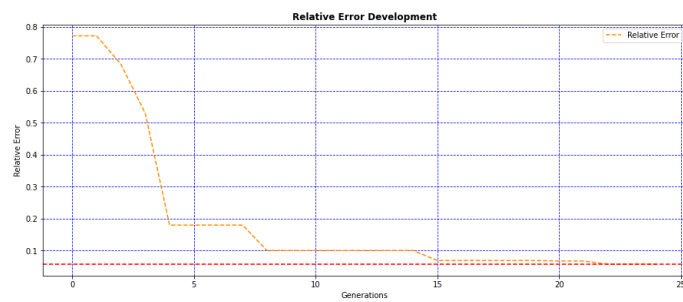

**Figure S31.** FTSE error behavior through 25 generations.

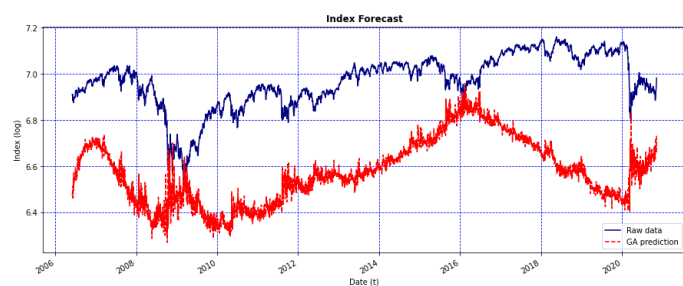

**Figure S32.** Curves for the FTSE training forecast (red line), and the original data (blue line).

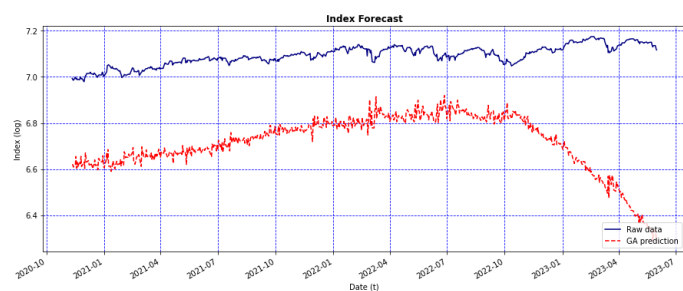

**Figure S33.** Graphs depicting the GA model's forecast using the testing set of the FTSE (red line), and the original data (blue line).

| Computed GA model |                           |
|-------------------|---------------------------|
| Gene              | Value                     |
| $\hat{a}_0$       | 2.825819                  |
| $\hat{a}_1$       | -4.166251                 |
| $\hat{a}_2$       | 4.763972                  |
| $\hat{a}_3$       | $1.298465 \times 10^{-2}$ |
| $\hat{a}_4$       | -0.136210                 |
| $\hat{a}_5$       | 3.931826                  |
| $\hat{a}_6$       | -10.222616                |
| $\hat{a}_7$       | -3.352121                 |
| $\hat{a}_8$       | 0.620355                  |
| $\hat{a}_9$       | -10.920465                |
| $\hat{a}_{10}$    | 7.231079                  |
| $\hat{a}_{11}$    | 6.218989                  |
| $\hat{a}_{12}$    | 4.678560                  |
| $\hat{a}_{13}$    | 5.344712                  |
| $\hat{a}_{14}$    | 2.355904                  |

**Table S16.** Computed GA's genotype with the coefficients (Genes) for the N225 model.

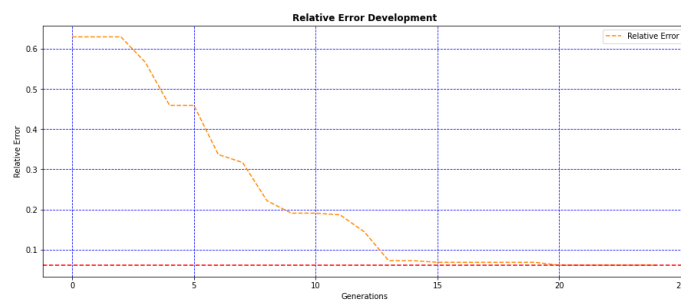

**Figure S34.** N225 error behavior through 25 generations.

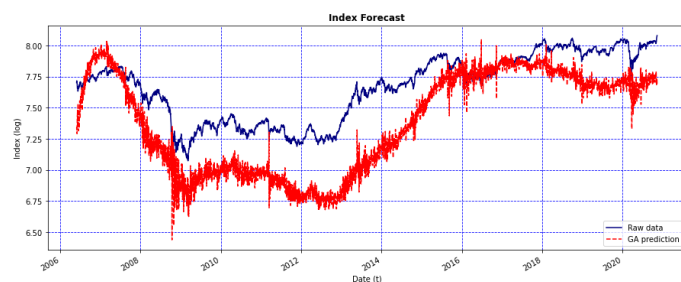

**Figure S35.** Curves for the N225 training forecast (red line), and the original data (blue line).

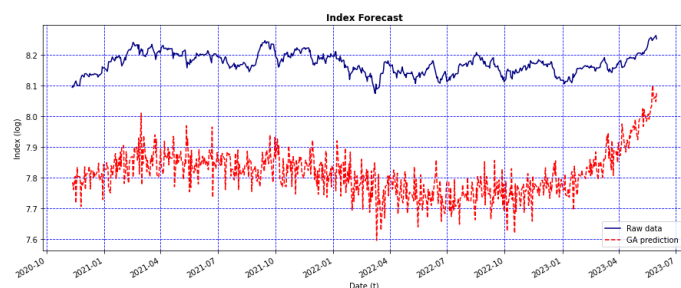

**Figure S36.** Graphs depicting the GA model's forecast using the testing set of the N225 (red line), and the original data (blue line).

| Computed GA model |                           |
|-------------------|---------------------------|
| Gene              | Value                     |
| $\hat{a}_0$       | -2.815794                 |
| $\hat{a}_1$       | 5.126774                  |
| $\hat{a}_2$       | -3.718289                 |
| $\hat{a}_3$       | $7.577315 \times 10^{-2}$ |
| $\hat{a}_4$       | 0.175781                  |
| $\hat{a}_5$       | 9.471851                  |
| $\hat{a}_6$       | 10.666745                 |
| $\hat{a}_7$       | -10.546244                |
| $\hat{a}_8$       | -5.262695                 |
| $\hat{a}_9$       | 10.520163                 |
| $\hat{a}_{10}$    | -11.312181                |
| $\hat{a}_{11}$    | 6.860403                  |
| $\hat{a}_{12}$    | -11.348953                |
| $\hat{a}_{13}$    | -8.072384                 |
| $\hat{a}_{14}$    | -9.382521                 |

**Table S17.** Computed GA's genotype with the coefficients (Genes) for the NDX model.

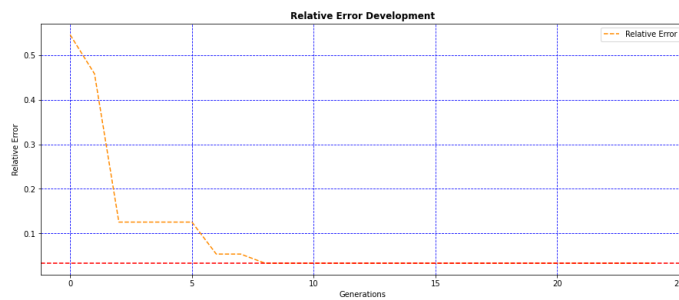

**Figure S37.** NDX error behavior through 25 generations.

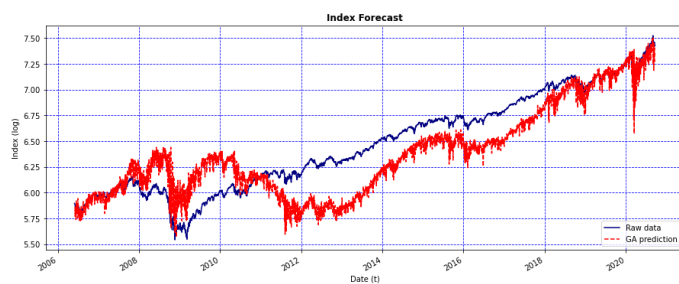

**Figure S38.** Curves for the NDX training forecast (red line), and the original data (blue line).

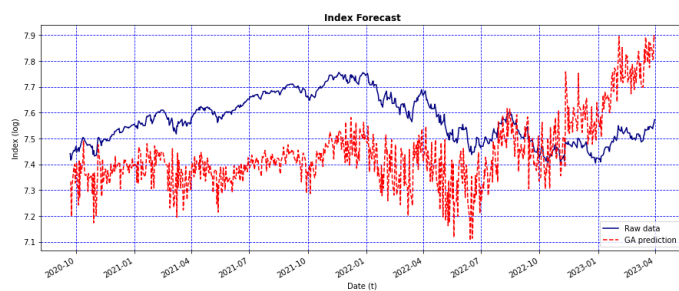

**Figure S39.** Graphs depicting the GA model's forecast using the testing set of the NDX (red line), and the original data (blue line).

| Computed GA model |                            |
|-------------------|----------------------------|
| Gene              | Value                      |
| $\hat{a}_0$       | 3.055734                   |
| $\hat{a}_1$       | -9.676661                  |
| $\hat{a}_2$       | 10.192865                  |
| $\hat{a}_3$       | $-3.125075 \times 10^{-2}$ |
| $\hat{a}_4$       | 0.121814                   |
| $\hat{a}_5$       | 11.299048                  |
| $\hat{a}_6$       | 11.557959                  |
| $\hat{a}_7$       | 11.347721                  |
| $\hat{a}_8$       | -10.336681                 |
| $\hat{a}_9$       | 11.272740                  |
| $\hat{a}_{10}$    | 5.092625                   |
| $\hat{a}_{11}$    | -8.637655                  |
| $\hat{a}_{12}$    | 10.066735                  |
| $\hat{a}_{13}$    | -8.942899                  |
| $\hat{a}_{14}$    | -7.666530                  |

**Table S18.** Computed GA's genotype with the coefficients (Genes) for the CAC model.

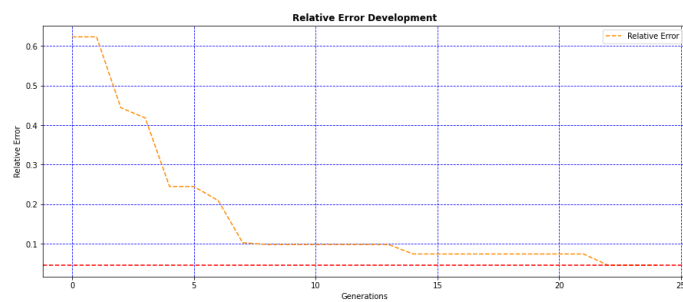

**Figure S40.** CAC error behavior through 25 generations.

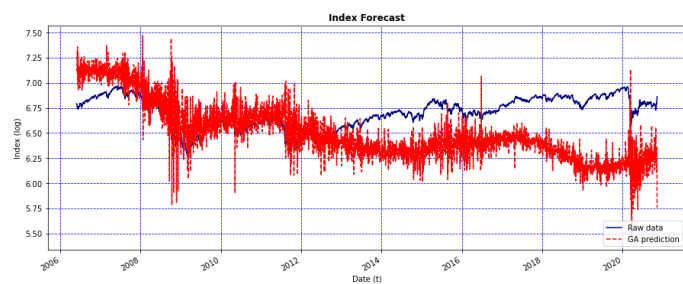

**Figure S41.** Curves for the CAC training forecast (red line), and the original data (blue line).

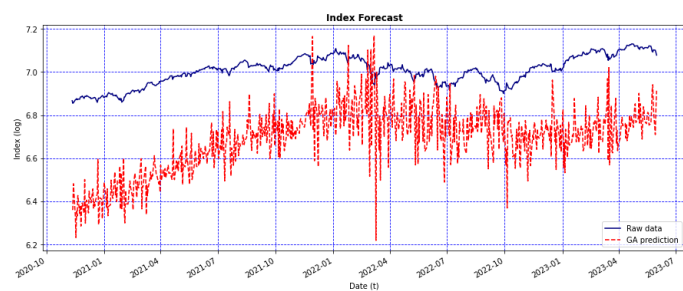

**Figure S42.** Graphs depicting the GA model's forecast using the testing set of the CAC (red line), and the original data (blue line).



### S3. Results for the Buy-and-Hold Strategy

This appendix contains complementary results for the experiments performed in Section 4.4, for the implementation of the Buy-and-Hold strategy of the rest of the indices.

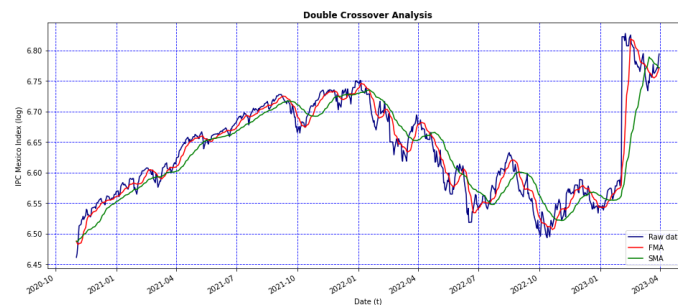

**Figure S43.** Curves of the S&P 500 forecast (blue line), with the 10-day FMA (red line), and 30-day SMA frames (green line).

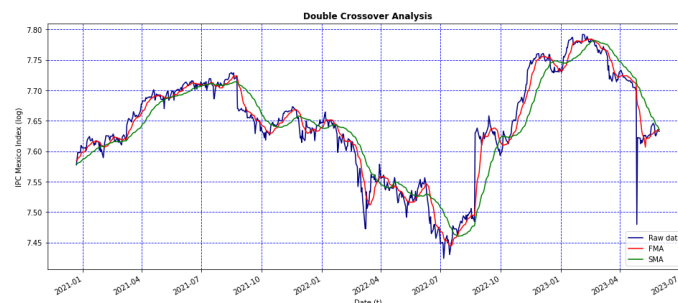

**Figure S44.** Curves of the DAX forecast (blue line), with the 10-day FMA (red line), and 30-day SMA frames (green line).

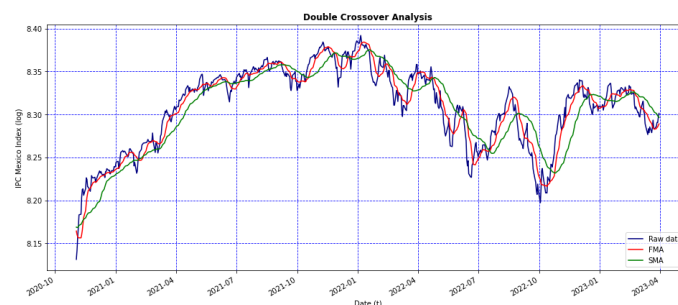

**Figure S45.** Curves of the DJIA forecast (blue line), with the 10-day FMA (red line), and 30-day SMA frames (green line).

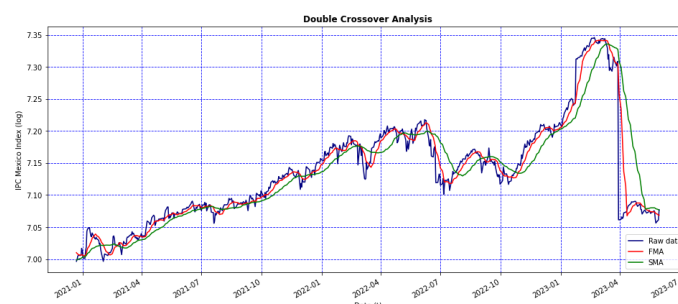

**Figure S46.** Curves of the FTSE forecast (blue line), with the 10-day FMA (red line), and 30-day SMA frames (green line).

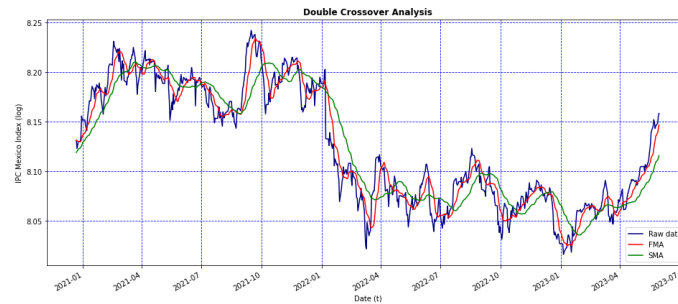

**Figure S47.** Curves of the N225 forecast (blue line), with the 10-day FMA (red line), and 30-day SMA frames (green line).

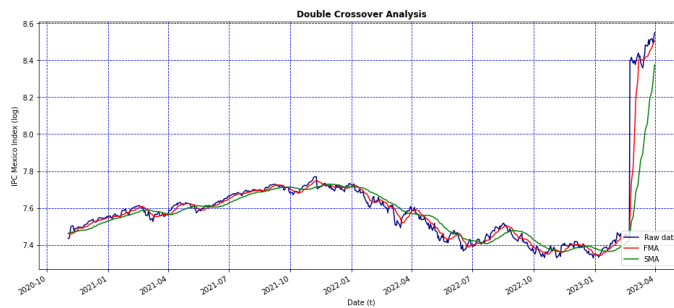

**Figure S48.** Curves of the NDX forecast (blue line), with the 10-day FMA (red line), and 30-day SMA frames (green line).

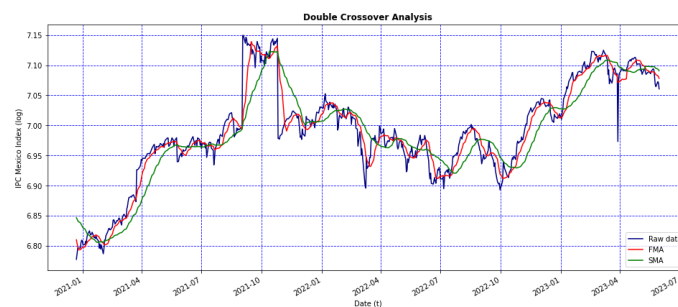

**Figure S49.** Curves of the CAC forecast (blue line), with the 10-day FMA (red line), and 30-day SMA frames (green line).
